# Supplementary material for: Ecosystem-specific patterns and drivers of global reactive iron mineral-associated organic carbon
Source: Copernicus journal article supplement (doi:10.5194/bg-20-4761-2023), 2023-12-01
Supplement: Supplementary file 1 [file bg-20-4761-2023-supplement.pdf]

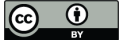

*Supplement of*

## **Ecosystem-specific patterns and drivers of global reactive iron mineral-associated organic carbon**

**Bo Zhao et al.**

*Correspondence to:* Qiang Wang (wqiang@lzu.edu.cn)

The copyright of individual parts of the supplement might differ from the article licence.

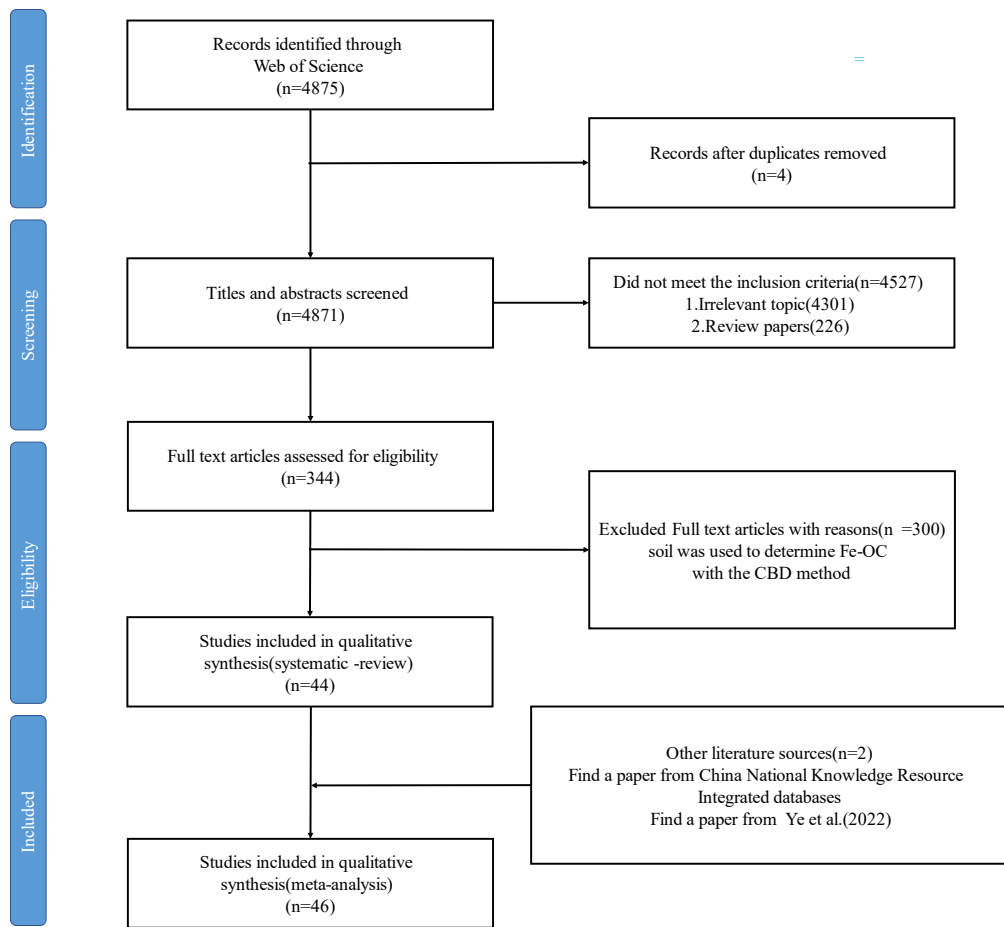

13

14 **Figure S1.** Preferred reporting items for systematic reviews and meta-analysis. See details of  
 15 literature search methods: (<https://www.webofscience.com/wos/allldb/summary/f8214414-7be5-4080-817b-7406a1f2247f-4f929e58/relevance/98>)

17

18

19

20

21

22

23

24

(a) Terrestrial

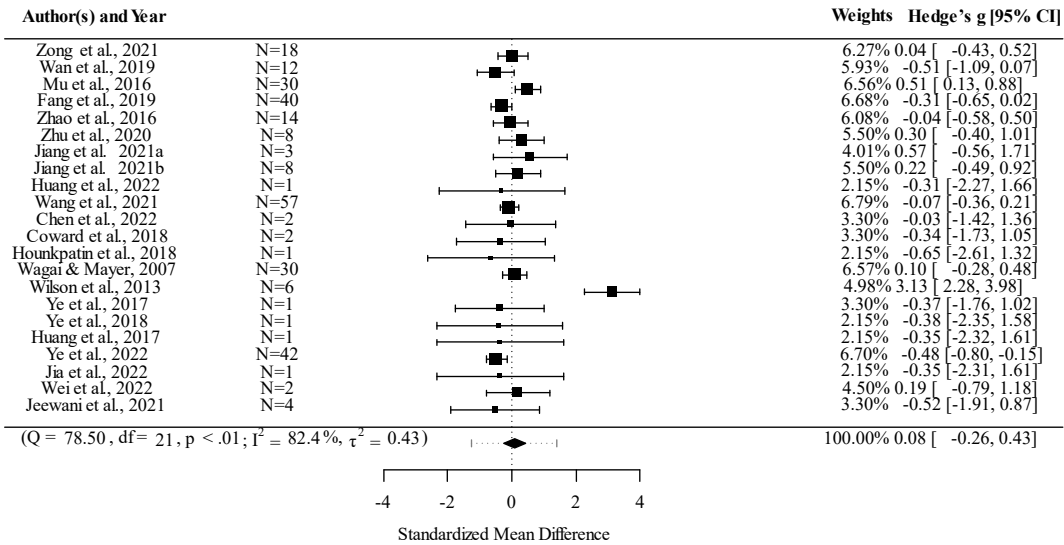

(b) Marine

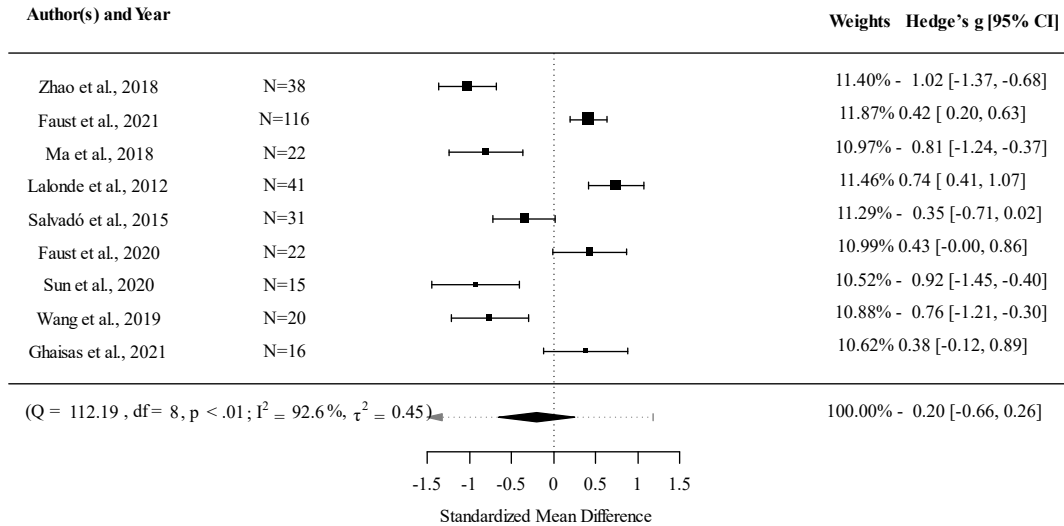

(c) Wetlands

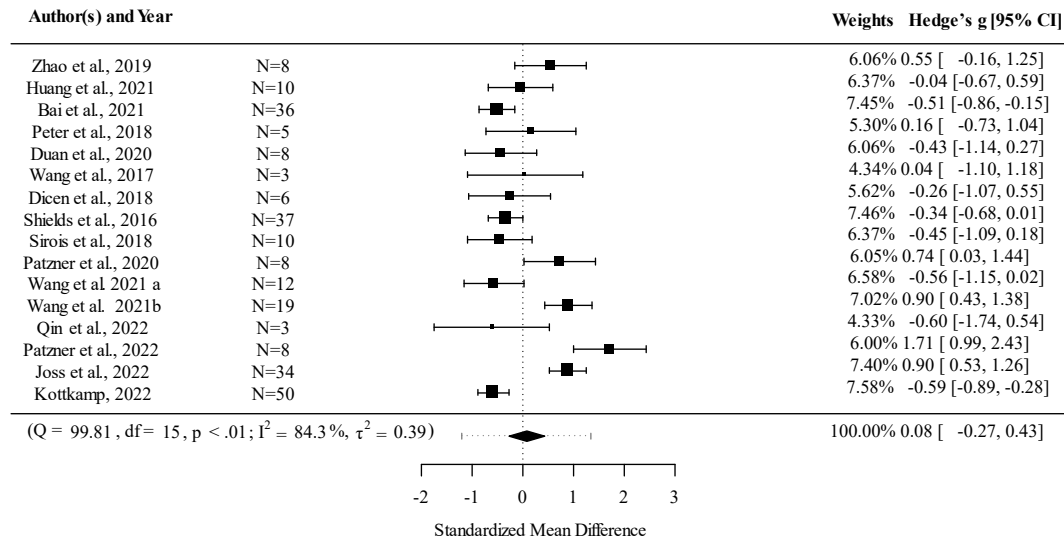

27

28 **Figure S2.** The effect sizes and confidence interval of the small sample sizes (i.e., a single  
29 published article) on Fe-OC contents in terrestrial (a), marine (b) and wetlands (c), respectively.

30 The value of the coordinate corresponds to the effect sizes, which is calculated by using the  
31 standardized mean difference between the control group and the treatment group. The total  
32 samples classified by continent, marine and wetlands are the control group, and the samples of a  
33 single case are the treatment group. The square size of each treatment group corresponds to the  
34 relative sample size. The horizontal line extending from each grid represents the confidence  
35 interval. The weights and confidence intervals of each group of effects are shown on the right. The  
36 position of each grid means that the Fe-OC of each treatment group is either higher (to the right of  
37 the dotted line) or lower (to the left of the dotted line) than that of the control group. The vertical  
38 dotted line is the zero effect quantity, and the confidence interval that does not overlap with the  
39 zero effect quantity is significantly different from the Fe-OC of the control group. Partial effects  
40 and their confidence intervals do not overlap with zero effects. The letter N represents the number  
41 of samples.

42

43 **Table S1.** The molar ratios of Fe-OC:Fe<sub>d</sub> across marine sediments and wetland ecosystems.

| <b>Location</b>                                         | <b>Fe-OC: Fe<sub>d</sub></b> | <b>References</b>        |
|---------------------------------------------------------|------------------------------|--------------------------|
| East China Sea                                          | 1.53 ± 1.28                  | Ma et al., 2018          |
| South Yellow Sea, China                                 | 1.68 ± 1.80                  | Ma et al., 2018          |
| Bohai Sea, China                                        | 1.59 ± 1.37                  | Wang et al., 2018        |
| Barents Sea                                             | 2.56 ± 1.76                  | Faust et al., 2020, 2021 |
| Arctic shelf                                            | 3.04 ± 1.73                  | Salvadó et al., 2015     |
| Intermediate/old river delta                            | 5.02 ± 5.85                  | Shields et al., 2016     |
| Changjiang Estuary/East China Sea shelf                 | 0.23 ± 0.14                  | Zhao et al., 2018        |
| Margin sea, China                                       | 2.75 ± 3.07                  | Sun et al., 2017         |
| Mississippi River                                       | 2.76 ± 1.50                  | Ghaisas et al., 2021     |
| Global oceans (n = 42)                                  | 6.10 ± 7.5                   | Lalonde et al., 2012     |
| <b>Global oceans (n = 320)</b>                          | <b>2.56 ± 0.19</b>           | <b>This study</b>        |
| Martinique Beach, Canada                                | 0.4 ± 0.7                    | Sirois et al., 2018      |
| Min River Estuary, China                                | 11.0 ± 4.5                   | Bai et al., 2021         |
| Petland, China                                          | 6.23 ± 3.34                  | Huang et al., 2021       |
| Freshwater wetland of Sanjiang Plain, China             | 2.24 ± 1.52                  | Duan et al., 2020        |
| Boreal lake sediment                                    | 5.92 ± 3.34                  | Peter et al., 2018       |
| Permafrost peatland                                     | 0.26 ± 0.09                  | Wang D et al., 2021      |
| Large-Scale wetlands (19.96°–52.04°N, 87.44°E–132.33°E) | 12.62 ± 11.46                | Wang S et al., 2021      |
| Drained thaw lake basins near Utqiagvik                 | 7.40 ± 5.18                  | Joss et al., 2022        |
| Delmarva Peninsula in the eastern U.S.A                 | 20.69 ± 27.89                | Kottkamp et al., 2022    |
| Mt. Shen Nong Jia, China                                | 84.75 ± 111.95               | Zhao et al., 2019        |
| <b>Global wetlands (n = 251)</b>                        | <b>13.47 ± 1.81</b>          | <b>This study</b>        |
